# Supplementary material
Source: PubMed Central journal article supplement (PMC6395916)
Supplement: AAC.02623-18-s0001.pdf [file AAC.02623-18-s0001.pdf]

***In vitro* activity of the new  $\beta$ -lactamase inhibitors relebactam and vaborbactam in combination with  $\beta$ -lactams against *Mycobacterium abscessus* complex clinical isolates**

Amit Kaushik, Nicole C. Ammerman, Jin Lee, Olumide Martins, Barry N. Kreiswirth, Gyanu Lamichhane, Nicole M. Parrish, Eric L. Nuermberger

---

**SUPPLEMENTAL MATERIALS**

**Tables**

- **Table S1.** MIC values in 7H9 media of carbapenems and faropenem (a penem) with and without  $\beta$ -lactamase inhibitors against 28 MDR MABC clinical isolates.
- **Table S2.** MIC values in 7H9 media of cephalosporins with and without  $\beta$ -lactamase inhibitors against 28 MDR MABC clinical isolates.
- **Table S3.** MIC values in CAMHB of  $\beta$ -lactams with and without  $\beta$ -lactamase inhibitors against 28 MDR MABC clinical isolates.
- **Table S4.** MIC<sub>50</sub> and MIC<sub>90</sub> values in CAMHB of  $\beta$ -lactams with and without  $\beta$ -lactamase inhibitors against 28 MDR MABC clinical isolates.
- **Table S5.** CLSI MIC breakpoint values and interpretive categories of carbapenems and cephalosporins included in this study.

**Figures**

- **Fig. S1.** Growth of MABC isolates in CAMHB and Middlebrook 7H9 broth.
- **Fig. S2.** Disk diffusion assay of  $\beta$ -lactams with and without  $\beta$ -lactamase inhibitors.

**TABLE S1** MIC values in 7H9 media of carbapenems and faropenem (a penem) with and without  $\beta$ -lactamase inhibitors against 28 MDR MABC clinical isolates.

| MABC strain | MIC ( $\mu$ g/mL) in 7H9 media for MABC strains of the following (carba)penems alone or in combination with relebactam (rele.) or vaborabactam (vabor.) |       |        |           |       |        |           |       |        |           |       |        |          |       |        |           |       |        |           |       |        |
|-------------|---------------------------------------------------------------------------------------------------------------------------------------------------------|-------|--------|-----------|-------|--------|-----------|-------|--------|-----------|-------|--------|----------|-------|--------|-----------|-------|--------|-----------|-------|--------|
|             | Biapenem                                                                                                                                                |       |        | Doripenem |       |        | Ertapenem |       |        | Faropenem |       |        | Imipenem |       |        | Meropenem |       |        | Tebipenem |       |        |
|             | Alone                                                                                                                                                   | Rele. | Vabor. | Alone     | Rele. | Vabor. | Alone     | Rele. | Vabor. | Alone     | Rele. | Vabor. | Alone    | Rele. | Vabor. | Alone     | Rele. | Vabor. | Alone     | Rele. | Vabor. |
| 1N          | 16                                                                                                                                                      | 4     | 8      | 16        | 4     | 4      | 256       | 16    | 128    | 128       | 32    | 32     | 8        | 4     | 4      | 32        | 4     | 4      | 256       | 8     | 16     |
| 2N          | 32                                                                                                                                                      | 8     | 8      | 32        | 8     | 8      | >256      | 32    | 32     | 128       | 32    | 32     | 8        | 8     | 8      | 64        | 8     | 8      | 256       | 16    | 32     |
| 3N          | 16                                                                                                                                                      | 4     | 4      | 16        | 4     | 4      | 256       | 16    | 32     | 128       | 32    | 32     | 8        | 4     | 4      | 32        | 4     | 4      | 256       | 8     | 32     |
| 4N          | 16                                                                                                                                                      | 4     | 8      | 16        | 4     | 4      | 128       | 16    | 32     | 64        | 32    | 32     | 8        | 8     | 8      | 16        | 4     | 4      | 256       | 8     | 16     |
| 5N          | 16                                                                                                                                                      | 8     | 8      | 16        | 8     | 4      | 128       | 16    | 16     | 128       | 32    | 32     | 8        | 8     | 8      | 16        | 4     | 4      | 256       | 8     | 16     |
| 6N          | 16                                                                                                                                                      | 4     | 4      | 32        | 4     | 4      | >256      | 16    | 32     | 256       | 32    | 32     | 8        | 2     | 2      | 16        | 4     | 4      | 256       | 8     | 32     |
| 11N         | 64                                                                                                                                                      | 8     | 8      | 64        | 8     | 8      | >256      | 64    | 64     | 64        | 32    | 32     | 16       | 16    | 8      | 64        | 8     | 8      | 64        | 8     | 8      |
| 12N         | 16                                                                                                                                                      | 4     | 4      | 16        | 4     | 4      | 256       | 16    | 32     | 256       | 32    | 32     | 8        | 4     | 4      | 16        | 4     | 4      | >256      | 16    | 32     |
| 13N         | 8                                                                                                                                                       | 4     | 8      | 16        | 4     | 4      | 256       | 16    | 16     | 64        | 16    | 16     | 16       | 8     | 8      | 8         | 4     | 4      | 128       | 4     | 8      |
| 14N         | 64                                                                                                                                                      | 8     | 16     | 64        | 16    | 16     | >256      | 128   | 256    | 256       | 64    | 64     | 16       | 4     | 4      | 64        | 16    | 16     | 256       | 32    | 64     |
| 19N         | 16                                                                                                                                                      | 2     | 4      | 16        | 2     | 4      | 256       | 16    | 16     | 128       | 32    | 32     | 4        | 2     | 2      | 16        | 2     | 4      | 256       | 4     | 8      |
| 201         | 64                                                                                                                                                      | 8     | 8      | 32        | 8     | 16     | >256      | 64    | 128    | >256      | 64    | 64     | 64       | 8     | 8      | 16        | 8     | 16     | >256      | 32    | 128    |
| 202         | 128                                                                                                                                                     | 16    | 32     | 64        | 8     | 16     | >256      | 128   | 256    | 256       | 64    | 64     | 32       | 8     | 32     | >256      | 16    | 64     | >256      | 16    | 256    |
| 203         | 64                                                                                                                                                      | 8     | 16     | 64        | 8     | 16     | >256      | 64    | 128    | 64        | 32    | 64     | 16       | 8     | 8      | 256       | 16    | 16     | 128       | 16    | 32     |
| 204         | 128                                                                                                                                                     | 16    | 32     | 128       | 16    | 32     | >256      | 256   | 256    | 256       | 64    | 64     | 16       | 8     | 8      | 128       | 32    | 32     | 256       | 64    | 64     |
| 206         | 16                                                                                                                                                      | 8     | 8      | 16        | 4     | 8      | 256       | 16    | 32     | 128       | 32    | 32     | 8        | 4     | 4      | 16        | 4     | 4      | 256       | 8     | 16     |
| 208         | 16                                                                                                                                                      | 4     | 8      | 16        | 4     | 4      | 256       | 16    | 32     | 128       | 32    | 32     | 16       | 8     | 8      | 16        | 4     | 4      | 256       | 8     | 32     |
| 210         | 32                                                                                                                                                      | 4     | 8      | 32        | 4     | 8      | >256      | 32    | 64     | 256       | 64    | 64     | 16       | 4     | 8      | 32        | 4     | 8      | >256      | 16    | 32     |
| 211         | 32                                                                                                                                                      | 4     | 8      | 32        | 4     | 8      | >256      | 32    | 64     | 256       | 64    | 64     | 8        | 8     | 8      | 32        | 4     | 8      | 256       | 16    | 64     |
| 212         | 16                                                                                                                                                      | 4     | 4      | 16        | 4     | 8      | 256       | 16    | 16     | 256       | 32    | 32     | 16       | 4     | 8      | 16        | 4     | 8      | 256       | 8     | 16     |
| 214         | 16                                                                                                                                                      | 4     | 8      | 16        | 4     | 4      | 256       | 16    | 32     | 64        | 32    | 32     | 16       | 8     | 8      | 16        | 4     | 4      | 128       | 8     | 16     |
| 215         | 32                                                                                                                                                      | 8     | 8      | 32        | 8     | 4      | 256       | 32    | 32     | 128       | 32    | 32     | 16       | 16    | 8      | 32        | 8     | 4      | 256       | 8     | 32     |
| 216         | 64                                                                                                                                                      | 16    | 16     | 64        | 8     | 8      | 256       | 128   | 64     | 256       | 64    | 64     | 16       | 8     | 8      | 32        | 8     | 8      | 256       | 32    | 64     |
| 218         | 16                                                                                                                                                      | 4     | 8      | 16        | 4     | 4      | 256       | 32    | 32     | 128       | 64    | 64     | 8        | 8     | 8      | 32        | 4     | 8      | 256       | 16    | 32     |
| JHH2        | 64                                                                                                                                                      | 8     | 16     | 256       | 8     | 16     | 256       | 128   | 128    | 128       | 64    | 64     | 32       | 8     | 16     | 128       | 8     | 16     | 256       | 32    | 64     |
| JHH4        | 32                                                                                                                                                      | 4     | 4      | 32        | 4     | 4      | 256       | 32    | 32     | 128       | 32    | 32     | 16       | 4     | 4      | 32        | 4     | 4      | 256       | 8     | 16     |
| JHH9        | 32                                                                                                                                                      | 4     | 4      | 32        | 4     | 4      | 256       | 16    | 32     | 128       | 32    | 32     | 8        | 4     | 4      | 32        | 4     | 8      | 256       | 8     | 16     |
| JHHKB       | 128                                                                                                                                                     | 16    | 16     | 256       | 16    | 32     | 256       | 128   | 128    | 128       | 64    | 64     | 32       | 16    | 16     | 128       | 16    | 32     | 128       | 32    | 32     |
| ATCC 19977  | 16                                                                                                                                                      | 4     | 4      | 16        | 4     | 4      | >256      | 16    | 32     | 128       | 32    | 32     | 8        | 4     | 4      | 16        | 4     | 4      | 256       | 8     | 16     |

Relebactam and vaborabactam were each used at a fixed concentration of 4  $\mu$ g/ml.

Assay medium was Middlebrook 7H9 broth supplemented with 0.5% (v/v) glycerol and 10% (v/v) Middlebrook OADC enrichment; MIC values were determined after 72 hours of incubation at 30°C.

**TABLE S2** MIC values in 7H9 media of cephalosporins with and without  $\beta$ -lactamase inhibitors against 28 MDR MABC clinical isolates.

| MABC strain | MIC ( $\mu\text{g/mL}$ ) in 7H9 media for MABC strains of the following cephalosporins alone or in combination with relebactam (rele.) or vaborabactam (vabor.) |       |        |          |       |        |            |       |        |           |       |        |             |       |        |             |       |        |             |       |        |            |       |        |    |
|-------------|-----------------------------------------------------------------------------------------------------------------------------------------------------------------|-------|--------|----------|-------|--------|------------|-------|--------|-----------|-------|--------|-------------|-------|--------|-------------|-------|--------|-------------|-------|--------|------------|-------|--------|----|
|             | Cefdinir                                                                                                                                                        |       |        | Cefepime |       |        | Cefotaxime |       |        | Cefoxitin |       |        | Cefpodoxime |       |        | Ceftaroline |       |        | Ceftriaxone |       |        | Cefuroxime |       |        |    |
|             | Alone                                                                                                                                                           | Rele. | Vabor. | Alone    | Rele. | Vabor. | Alone      | Rele. | Vabor. | Alone     | Rele. | Vabor. | Alone       | Rele. | Vabor. | Alone       | Rele. | Vabor. | Alone       | Rele. | Vabor. | Alone      | Rele. | Vabor. |    |
| 1N          | 64                                                                                                                                                              | 16    | 16     | 16       | 16    | 16     | 128        | 32    | 32     | 32        | 32    | 32     | 32          | >256  | 32     | 64          | >256  | 16     | 32          | >256  | 32     | 32         | 128   | 8      | 16 |
| 2N          | 64                                                                                                                                                              | 16    | 8      | 32       | 32    | 32     | 128        | 32    | 32     | 32        | 32    | 32     | 256         | 64    | 64     | >256        | 32    | 32     | >256        | 64    | 64     | 128        | 16    | 16     |    |
| 3N          | 64                                                                                                                                                              | 16    | 16     | 16       | 16    | 16     | 128        | 32    | 32     | 32        | 32    | 32     | >256        | 32    | 64     | >256        | 16    | 32     | >256        | 32    | 32     | 128        | 8     | 16     |    |
| 4N          | 64                                                                                                                                                              | 16    | 16     | 32       | 32    | 16     | 128        | 32    | 32     | 32        | 32    | 32     | 256         | 64    | 64     | >256        | 16    | 32     | >256        | 32    | 32     | 128        | 8     | 16     |    |
| 5N          | 64                                                                                                                                                              | 16    | 16     | 32       | 16    | 32     | 64         | 32    | 32     | 16        | 16    | 16     | 256         | 32    | 32     | >256        | 16    | 16     | >256        | 32    | 32     | 128        | 8     | 8      |    |
| 6N          | 128                                                                                                                                                             | 16    | 32     | 32       | 8     | 16     | 256        | 64    | 64     | 32        | 32    | 32     | >256        | 64    | 64     | >256        | 16    | 64     | >256        | 64    | 128    | 256        | 16    | 16     |    |
| 11N         | 64                                                                                                                                                              | 16    | 16     | 64       | 64    | 64     | 64         | 32    | 16     | 32        | 32    | 32     | 256         | 64    | 64     | >256        | 32    | 32     | >256        | 32    | 32     | 128        | 8     | 16     |    |
| 12N         | 128                                                                                                                                                             | 32    | 32     | 16       | 16    | 8      | 128        | 64    | 64     | 32        | 16    | 16     | >256        | 64    | 64     | >256        | 16    | 32     | >256        | 64    | 64     | 256        | 16    | 16     |    |
| 13N         | 32                                                                                                                                                              | 16    | 16     | 64       | 64    | 64     | 64         | 32    | 16     | 32        | 16    | 16     | 128         | 64    | 64     | 256         | 16    | 16     | 256         | 32    | 32     | 64         | 8     | 8      |    |
| 14N         | 64                                                                                                                                                              | 8     | 32     | 64       | 16    | 16     | 64         | 32    | 32     | 64        | 64    | 64     | 256         | 64    | 64     | 256         | 256   | 128    | 128         | 64    | 64     | 16         | 16    | 16     |    |
| 19N         | 64                                                                                                                                                              | 16    | 16     | 32       | 8     | 16     | 128        | 32    | 32     | 32        | 32    | 32     | 256         | 32    | 64     | >256        | 16    | 32     | >256        | 32    | 64     | 256        | 16    | 32     |    |
| 201         | 64                                                                                                                                                              | 16    | 16     | 64       | 16    | 16     | 256        | 64    | 128    | 32        | 32    | 32     | >256        | 128   | 128    | >256        | 32    | 128    | >256        | 64    | 128    | >256       | 16    | 32     |    |
| 202         | 32                                                                                                                                                              | 16    | 16     | 128      | 16    | 32     | 256        | 64    | 64     | 64        | 64    | 64     | 256         | 64    | 64     | >256        | 16    | 32     | >256        | 64    | 64     | >256       | 32    | 32     |    |
| 203         | 256                                                                                                                                                             | 64    | 64     | 32       | 16    | 32     | 32         | 16    | 16     | 32        | 32    | 32     | 128         | 32    | 32     | 256         | 16    | 32     | 128         | 16    | 16     | 32         | 8     | 8      |    |
| 204         | 256                                                                                                                                                             | 32    | 128    | 32       | 16    | 16     | 64         | 32    | 32     | 64        | 64    | 32     | 128         | 64    | 64     | >256        | 64    | 64     | 256         | 64    | 64     | 64         | 16    | 16     |    |
| 206         | 32                                                                                                                                                              | 16    | 16     | 32       | 32    | 16     | 64         | 32    | 32     | 16        | 32    | 16     | 128         | 32    | 32     | 256         | 8     | 8      | 256         | 16    | 16     | 128        | 8     | 8      |    |
| 208         | 64                                                                                                                                                              | 32    | 32     | 32       | 32    | 16     | 128        | 32    | 32     | 32        | 32    | 32     | >256        | 64    | 64     | >256        | 16    | 32     | >256        | 32    | 64     | 128        | 8     | 16     |    |
| 210         | 128                                                                                                                                                             | 32    | 32     | 32       | 8     | 16     | 256        | 32    | 64     | 32        | 32    | 32     | >256        | 64    | 64     | >256        | 16    | 32     | >256        | 64    | 64     | 128        | 16    | 16     |    |
| 211         | 64                                                                                                                                                              | 16    | 16     | 32       | 8     | 8      | 128        | 32    | 64     | 32        | 32    | 32     | >256        | 64    | 64     | >256        | 16    | 32     | >256        | 64    | 64     | 128        | 16    | 16     |    |
| 212         | 128                                                                                                                                                             | 32    | 32     | 32       | 16    | 16     | 128        | 32    | 32     | 16        | 16    | 16     | 256         | 32    | 32     | 256         | 8     | 8      | >256        | 32    | 64     | 128        | 8     | 8      |    |
| 214         | 128                                                                                                                                                             | 32    | 32     | 32       | 32    | 32     | 64         | 32    | 32     | 32        | 16    | 16     | 256         | 32    | 32     | >256        | 8     | 16     | >256        | 16    | 32     | 64         | 8     | 8      |    |
| 215         | 64                                                                                                                                                              | 16    | 16     | 32       | 32    | 32     | 128        | 32    | 32     | 32        | 32    | 32     | >256        | 64    | 64     | >256        | 16    | 32     | >256        | 32    | 32     | 128        | 8     | 8      |    |
| 216         | 128                                                                                                                                                             | 32    | 32     | 64       | 64    | 64     | 256        | 64    | 64     | 32        | 32    | 32     | >256        | 64    | 128    | >256        | 32    | 32     | >256        | 128   | 128    | >256       | 32    | 32     |    |
| 218         | 128                                                                                                                                                             | 32    | 32     | 64       | 64    | 64     | 256        | 64    | 64     | 32        | 32    | 32     | >256        | 64    | 128    | >256        | 32    | 32     | >256        | 128   | 128    | >256       | 32    | 32     |    |
| JHH2        | 32                                                                                                                                                              | 16    | 16     | 64       | 32    | 32     | 64         | 64    | 64     | 128       | 32    | 64     | 64          | 128   | 64     | 256         | 32    | 64     | >256        | 64    | 128    | 256        | 32    | 32     |    |
| JHH4        | 128                                                                                                                                                             | 32    | 64     | 16       | 16    | 16     | 64         | 32    | 32     | 32        | 32    | 32     | 128         | 32    | 32     | >256        | 16    | 16     | >256        | 32    | 32     | 128        | 16    | 16     |    |
| JHH9        | 128                                                                                                                                                             | 16    | 32     | 32       | 16    | 16     | 128        | 32    | 32     | 32        | 32    | 32     | 256         | 32    | 32     | >256        | 16    | 32     | >256        | 32    | 32     | 256        | 16    | 32     |    |
| JHHKB       | 64                                                                                                                                                              | 16    | 16     | 64       | 64    | 64     | 64         | 32    | 32     | 64        | 32    | 32     | 256         | 64    | 64     | >256        | 64    | 32     | >256        | 128   | 64     | 128        | 32    | 32     |    |
| ATCC 19977  | 64                                                                                                                                                              | 32    | 32     | 32       | 16    | 16     | 256        | 64    | 64     | 32        | 32    | 32     | >256        | 64    | 64     | >256        | 32    | 32     | >256        | 64    | 64     | 256        | 16    | 32     |    |

Relebactam and vaborbactam were each used at a fixed concentration of 4  $\mu\text{g/ml}$ .

Assay medium was Middlebrook 7H9 broth supplemented with 0.5% (v/v) glycerol and 10% (v/v) Middlebrook OADC enrichment; MIC values were determined after 72 hours of incubation at 30°C.

**Table S3** MIC values in CAMHB of  $\beta$ -lactams with and without  $\beta$ -lactamase inhibitors against 28 MDR MABC clinical isolates.

| MABC strain | Incubation time (days) | MIC ( $\mu$ g/mL) in CAMHB for MABC strains of the following $\beta$ -lactams alone or in combination with relebactam (rele.) or vaborabactam (vabor.) |       |        |           |       |        |          |       |        |           |       |        |          |       |        |          |       |        |            |       |        |
|-------------|------------------------|--------------------------------------------------------------------------------------------------------------------------------------------------------|-------|--------|-----------|-------|--------|----------|-------|--------|-----------|-------|--------|----------|-------|--------|----------|-------|--------|------------|-------|--------|
|             |                        | Doripenem                                                                                                                                              |       |        | Ertapenem |       |        | Imipenem |       |        | Meropenem |       |        | Cefdinir |       |        | Cefepime |       |        | Cefuroxime |       |        |
|             |                        | Alone                                                                                                                                                  | Rele. | Vabor. | Alone     | Rele. | Vabor. | Alone    | Rele. | Vabor. | Alone     | Rele. | Vabor. | Alone    | Rele. | Vabor. | Alone    | Rele. | Vabor. | Alone      | Rele. | Vabor. |
| 1N          | 4.5                    | 32                                                                                                                                                     | 16    | 16     | 256       | 128   | 64     | 16       | 8     | 8      | 64        | 16    | 16     | 256      | 16    | 16     | 256      | 64    | 64     | 256        | 32    | 32     |
| 2N          | 6.0                    | 16                                                                                                                                                     | 16    | 8      | 256       | 64    | 32     | 16       | 8     | 8      | 64        | 8     | 16     | 32       | 8     | 8      | 64       | 64    | 64     | 64         | 32    | 32     |
| 3N          | 4.5                    | 64                                                                                                                                                     | 16    | 16     | 256       | 64    | 128    | 16       | 16    | 4      | 64        | 16    | 16     | 128      | 32    | 16     | 256      | 64    | 64     | >256       | 64    | 64     |
| 4N          | 4.5                    | 128                                                                                                                                                    | 32    | 16     | 256       | 64    | 64     | 32       | 16    | 16     | 64        | 32    | 32     | 128      | 64    | 32     | 128      | 64    | 64     | 256        | 64    | 64     |
| 5N          | 4.5                    | 32                                                                                                                                                     | 16    | 16     | 128       | 64    | 64     | 16       | 8     | 8      | 32        | 16    | 16     | 32       | 16    | 16     | 128      | 64    | 64     | 64         | 16    | 16     |
| 6N          | 4.5                    | 64                                                                                                                                                     | 16    | 16     | 256       | 128   | 128    | 32       | 16    | 8      | 64        | 32    | 16     | 128      | 16    | 32     | 128      | 64    | 64     | 256        | 128   | 64     |
| 11N         | 6.0                    | 16                                                                                                                                                     | 16    | 8      | 256       | 128   | 64     | 8        | 8     | 8      | 32        | 16    | 8      | 32       | 32    | 16     | 64       | 64    | 64     | 64         | 64    | 64     |
| 12N         | 4.5                    | 64                                                                                                                                                     | 32    | 16     | >256      | 256   | 64     | 64       | 32    | 8      | 64        | 64    | 32     | 128      | 64    | 32     | 256      | 64    | 64     | >256       | 64    | 64     |
| 13N         | 4.5                    | 32                                                                                                                                                     | 8     | 8      | 128       | 64    | 64     | 8        | 4     | 4      | 64        | 16    | 16     | 4        | 8     | 4      | 64       | 64    | 64     | 64         | 32    | 16     |
| 14N         | 4.5                    | 16                                                                                                                                                     | 16    | 8      | 128       | 64    | 32     | 16       | 8     | 8      | 64        | 64    | 8      | 16       | 16    | 32     | 64       | 64    | 64     | 64         | 64    | 32     |
| 19N         | 4.5                    | 32                                                                                                                                                     | 16    | 16     | 256       | 64    | 64     | 16       | 8     | 8      | 32        | 16    | 16     | 32       | 8     | 8      | 128      | 64    | 64     | 128        | 16    | 32     |
| 201         | 4.5                    | 128                                                                                                                                                    | 64    | 16     | >256      | 128   | 128    | 32       | 32    | 4      | 128       | 64    | 64     | 128      | 64    | 64     | 256      | 128   | 128    | 128        | 64    | 128    |
| 202         | 4.5                    | 64                                                                                                                                                     | 8     | 32     | 64        | 64    | 128    | 16       | 8     | 4      | 64        | 32    | 16     | 128      | 32    | 32     | 256      | 64    | 32     | 256        | 64    | 32     |
| 203         | 4.5                    | 64                                                                                                                                                     | 32    | 8      | 256       | 64    | 32     | 8        | 4     | 4      | 64        | 32    | 16     | 32       | 16    | 8      | 64       | 64    | 32     | 64         | 64    | 16     |
| 204         | 4.5                    | 64                                                                                                                                                     | 32    | 16     | 128       | 128   | 64     | 8        | 8     | 8      | 64        | 64    | 32     | 32       | 32    | 8      | 64       | 64    | 64     | 128        | 64    | 64     |
| 206         | 4.5                    | 8                                                                                                                                                      | 8     | 8      | 256       | 32    | 16     | 8        | 4     | 4      | 16        | 8     | 16     | 32       | 8     | 8      | 256      | 64    | 64     | 256        | 8     | 8      |
| 208         | 4.5                    | 64                                                                                                                                                     | 16    | 16     | 256       | 64    | 64     | 16       | 8     | 8      | 64        | 16    | 16     | 32       | 8     | 16     | 128      | 64    | 64     | 128        | 16    | 16     |
| 210         | 4.5                    | 64                                                                                                                                                     | 16    | 16     | >256      | 128   | 128    | 32       | 8     | 8      | 128       | 32    | 16     | 64       | 32    | 32     | 128      | 64    | 64     | 64         | 64    | 64     |
| 211         | 4.5                    | 128                                                                                                                                                    | 16    | 16     | >256      | 256   | 32     | 32       | 8     | 8      | 64        | 32    | 32     | 256      | 64    | 32     | 256      | 128   | 64     | 64         | 128   | 64     |
| 212         | 4.5                    | 32                                                                                                                                                     | 16    | 16     | >256      | 128   | 64     | 16       | 8     | 8      | 32        | 16    | 8      | 64       | 16    | 16     | 256      | 64    | 64     | >256       | 128   | 64     |
| 214         | 4.5                    | 32                                                                                                                                                     | 8     | 16     | 256       | 32    | 64     | 16       | 16    | 8      | 32        | 16    | 16     | 16       | 8     | 8      | 64       | 64    | 64     | 32         | 8     | 32     |
| 215         | 4.5                    | 16                                                                                                                                                     | 8     | 8      | 128       | 32    | 16     | 4        | 4     | 2      | 16        | 8     | 8      | 32       | 8     | 4      | 64       | 64    | 32     | 64         | 16    | 8      |
| 216         | 4.5                    | 64                                                                                                                                                     | 32    | 32     | 128       | 64    | 256    | 32       | 32    | 4      | 32        | 32    | 32     | 64       | 32    | 16     | 128      | 64    | 32     | 128        | 32    | 64     |
| 218         | 4.5                    | 16                                                                                                                                                     | 8     | 8      | 32        | 16    | 64     | 8        | 2     | 4      | 32        | 4     | 8      | 16       | 16    | 8      | 64       | 32    | 32     | 16         | 32    | 16     |
| JHH2        | 4.5                    | 32                                                                                                                                                     | 32    | 16     | 256       | 32    | 64     | 32       | 8     | 8      | 64        | 16    | 16     | 128      | 16    | 8      | 256      | 32    | 64     | 256        | 16    | 32     |
| JHH4        | 4.5                    | 32                                                                                                                                                     | 16    | 16     | 256       | 64    | 64     | 16       | 16    | 8      | 32        | 16    | 16     | 32       | 8     | 8      | 128      | 64    | 64     | 256        | 32    | 16     |
| JHH9        | 4.5                    | 64                                                                                                                                                     | 16    | 16     | 256       | 128   | 64     | 32       | 8     | 8      | 64        | 16    | 16     | 64       | 16    | 16     | 128      | 64    | 64     | 128        | 64    | 32     |
| JHHKB       | 6.0                    | 16                                                                                                                                                     | 8     | 8      | >256      | 128   | 256    | 8        | 8     | 4      | 64        | 8     | 8      | 32       | 4     | 16     | 64       | 32    | 64     | 32         | 4     | 4      |
| ATCC 19977  | 3.0                    | 32                                                                                                                                                     | 8     | 16     | 256       | 64    | 64     | 16       | 4     | 8      | 32        | 8     | 16     | 128      | 32    | 16     | 128      | 64    | 64     | 256        | 32    | 64     |

Relebactam and vaborbactam were each used at a fixed concentration of 4  $\mu$ g/ml.

Assay medium was Mueller-Hinton II broth, cation-adjusted; MIC values were determined after incubation at 30°C for the duration indicated.

**TABLE S4** MIC<sub>50</sub> and MIC<sub>90</sub> values in CAMHB of  $\beta$ -lactams with and without  $\beta$ -lactamase inhibitors against 28 MDR MABC clinical isolates

| $\beta$ -lactam tested          | MICs ( $\mu$ g/mL) in CAMHB for MABC clinical isolates |                   |                   |                 |                   |                   |                  |                   |                   |
|---------------------------------|--------------------------------------------------------|-------------------|-------------------|-----------------|-------------------|-------------------|------------------|-------------------|-------------------|
|                                 | Alone                                                  |                   |                   | With relebactam |                   |                   | With vaborbactam |                   |                   |
|                                 | Range                                                  | MIC <sub>50</sub> | MIC <sub>90</sub> | Range           | MIC <sub>50</sub> | MIC <sub>90</sub> | Range            | MIC <sub>50</sub> | MIC <sub>90</sub> |
| <b>Parenteral carbapenems</b>   |                                                        |                   |                   |                 |                   |                   |                  |                   |                   |
| Doripenem                       | 8 - 128                                                | 32                | 128               | 8 - 64          | 16                | 32                | 8 - 32           | 16                | 16                |
| Ertapenem                       | 32 - 256                                               | 256               | 256               | 16 - 256        | 64                | 128               | 16 - 256         | 64                | 128               |
| Imipenem                        | 4 - 64                                                 | 16                | 32                | 2 - 32          | 8                 | 32                | 2 - 16           | 8                 | 8                 |
| Meropenem                       | 16 - 128                                               | 64                | 64                | 4 - 64          | 16                | 64                | 8 - 64           | 16                | 32                |
| <b>Oral cephalosporins</b>      |                                                        |                   |                   |                 |                   |                   |                  |                   |                   |
| Cefdinir                        | 4 - 256                                                | 32                | 128               | 4 - 64          | 16                | 64                | 4 - 64           | 16                | 32                |
| Cefuroxime                      | 16 - 256                                               | 128               | 256               | 4 - 128         | 32                | 128               | 4 - 128          | 32                | 64                |
| <b>Parenteral cephalosporin</b> |                                                        |                   |                   |                 |                   |                   |                  |                   |                   |
| Cefepime                        | 64 - 256                                               | 128               | 256               | 32 - 128        | 64                | 64                | 32 - 128         | 64                | 64                |

Relebactam and vaborbactam were each used at a fixed concentration of 4  $\mu$ g/ml.

Assay medium was Mueller-Hinton II broth, cation-adjusted; MIC values were determined after incubation at 30°C for the duration indicated in **Table S3**.

MIC values for each strain are provided in **Table S3**.

Cefuroxime is available in both oral and parenteral formulations.

**TABLE S5** CLSI MIC breakpoint values and interpretive categories of carbapenems and cephalosporins included in this study.

| $\beta$ -lactam         | CLSI interpretive categories and MIC breakpoints ( $\mu\text{g/ml}$ ) for the following organisms: |              |            |                           |              |           |             |              |           |
|-------------------------|----------------------------------------------------------------------------------------------------|--------------|------------|---------------------------|--------------|-----------|-------------|--------------|-----------|
|                         | Rapidly growing mycobacteria                                                                       |              |            | <i>Enterobacteriaceae</i> |              |           | Anaerobes   |              |           |
|                         | Susceptible                                                                                        | Intermediate | Resistant  | Susceptible               | Intermediate | Resistant | Susceptible | Intermediate | Resistant |
| <u>Carbapenems</u>      |                                                                                                    |              |            |                           |              |           |             |              |           |
| Doripenem               |                                                                                                    |              |            | $\leq 1$                  | 2            | $\geq 4$  | $\leq 2$    | 4            | $\geq 8$  |
| Ertapenem               |                                                                                                    |              |            | $\leq 0.5$                | 1            | $\geq 2$  | $\leq 4$    | 8            | $\geq 16$ |
| Imipenem                | $\leq 4$                                                                                           | 8-16         | $\geq 32$  | $\leq 1$                  | 2            | $\geq 4$  | $\leq 4$    | 8            | $\geq 16$ |
| Meropenem               | $\leq 4$                                                                                           | 8-16         | $\geq 32$  | $\leq 1$                  | 2            | $\geq 4$  | $\leq 4$    | 8            | $\geq 16$ |
| <u>Cephalosporins</u>   |                                                                                                    |              |            |                           |              |           |             |              |           |
| Cefdinir                |                                                                                                    |              |            | $\leq 1$                  | 2            | $\geq 4$  |             |              |           |
| Cefepime                |                                                                                                    |              |            | $\leq 2$                  | 4-8          | $\geq 16$ |             |              |           |
| Cefoxitin               | $\leq 16$                                                                                          | 32-64        | $\geq 128$ | $\leq 8$                  | 16           | $\geq 32$ | $\leq 16$   | 32           | $\geq 64$ |
| Cefotaxime              |                                                                                                    |              |            | $\leq 1$                  | 2            | $\geq 4$  | $\leq 16$   | 32           | $\geq 64$ |
| Cefpodoxime             |                                                                                                    |              |            | $\leq 2$                  | 4            | $\geq 8$  |             |              |           |
| Ceftaroline             |                                                                                                    |              |            | $\leq 0.5$                | 1            | $\geq 2$  |             |              |           |
| Ceftriaxone             |                                                                                                    |              |            | $\leq 1$                  | 2            | $\geq 4$  | $\leq 16$   | 32           | $\geq 64$ |
| Cefuroxime (oral)       |                                                                                                    |              |            | $\leq 4$                  | 8-16         | $\geq 32$ |             |              |           |
| Cefuroxime (parenteral) |                                                                                                    |              |            | $\leq 8$                  | 16           | $\geq 32$ |             |              |           |

Information obtained from CLSI guidelines (22, 31).

Breakpoints are not available for biapenem, faropenem, and tebipenem.

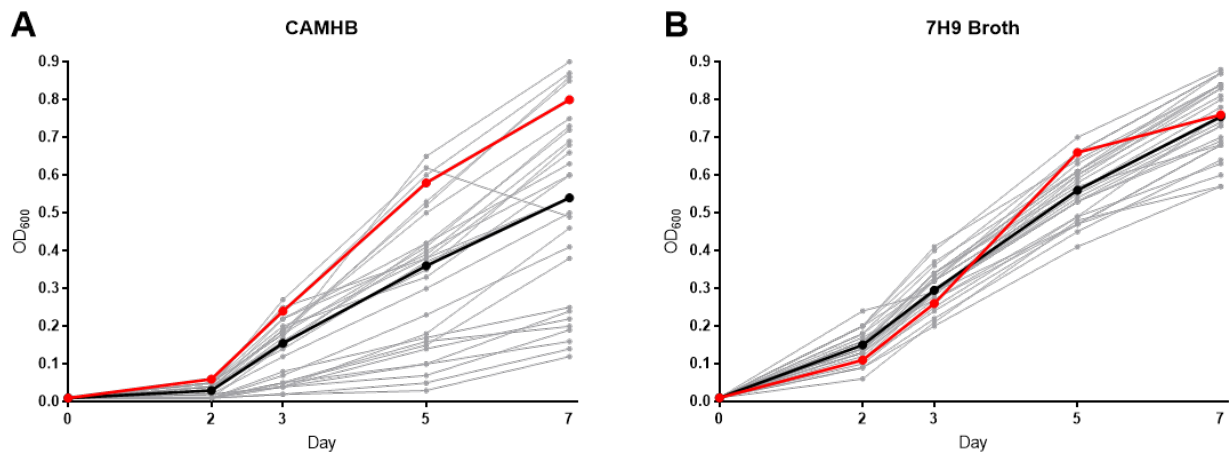

**FIG. S1** Growth of MABC isolates in **A)** CAMHB and **B)** Middlebrook 7H9 broth. The cultures were adjusted to a starting  $OD_{600}$  of 0.01, and the  $OD_{600}$  was monitored during 7 days of incubation at 30°C. The growth curve for the ATCC 19977 strain is shown in red. The growth curves for the individual clinical isolates are shown in gray, and the median growth curve for clinical isolates is shown in black.

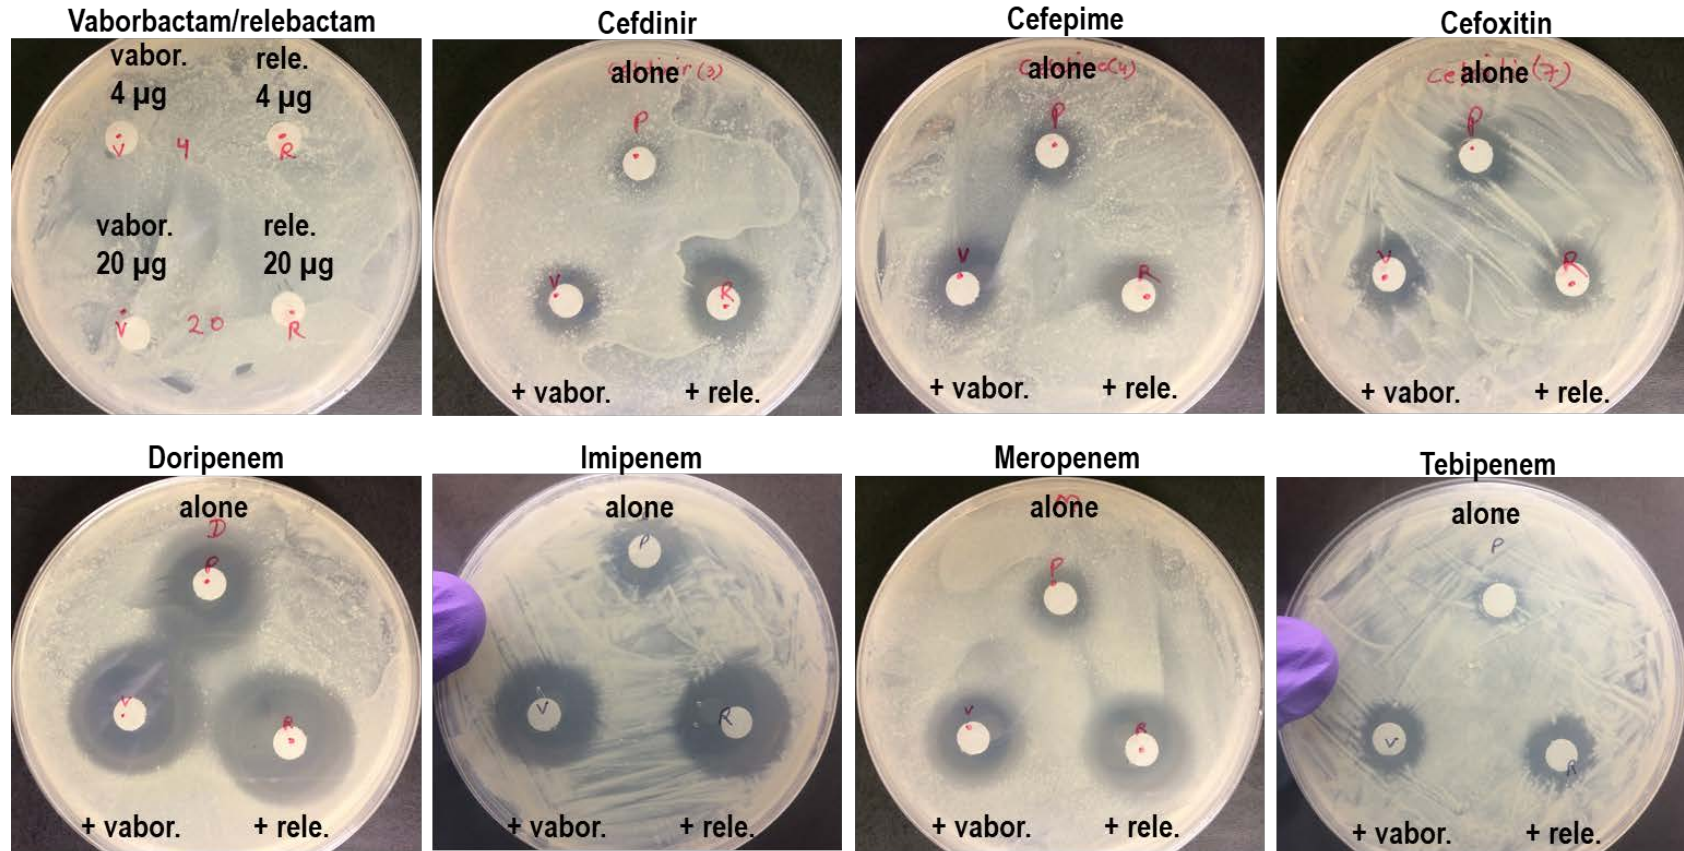

**FIG. S2** Disk diffusion assay of  $\beta$ -lactams with and without  $\beta$ -lactamase inhibitors. Paper disks containing 20  $\mu$ g carbapenems (doripenem, imipenem, meropenem, or tebipenem), 20  $\mu$ g cephalosporins (cefdinir, cefepime, cefoxitin) and/or  $\beta$ -lactamase inhibitors (4 or 20  $\mu$ g alone; 4  $\mu$ g in combination) were incubated with *M. abscessus* strain ATCC 19977 for 4 days at 37°C.
